# Supplementary material
Source: PubMed Central journal article supplement (PMC6604099)
Supplement: jamainternmed-179-1230-s001.pdf [file jamainternmed-179-1230-s001.pdf]

## Supplementary Online Content

Kerlikowske K, Sprague BL, Tosteson ANA, et al. Strategies to identify women at high risk of advanced breast cancer during routine screening for discussion of supplemental imaging. *JAMA Intern Med*. Published online July 1, 2019. doi:10.1001/jamainternmed.2019.1758

**eTable.** Overall Discrimination to Predict Advanced Disease by Risk Factors

This supplementary material has been provided by the authors to give readers additional information about their work.

**eTable.** Overall Discrimination to Predict Advanced Disease by Risk Factors

| <b>Strategy</b>                           | <b>Average AUC<br/>(minimum, maximum)</b> |
|-------------------------------------------|-------------------------------------------|
| Breast density only                       | 0.584 (0.537, 0.629)                      |
| Breast density and age                    | 0.600 (0.554, 0.661)                      |
| Breast density and BCSC risk <sup>a</sup> | 0.642 (0.591, 0.674)                      |

AUC: area under the receiver operating characteristic curve, minimum and maximum of 5-fold cross validation

<sup>a</sup>Breast Cancer Surveillance Consortium (BCSC) 5-year risk calculated using age, race/ethnicity, first degree family history of breast cancer, history of breast biopsy, Breast Imaging Reporting and Data System breast density
